# Supplementary material
Source: PubMed Central journal article supplement (PMC11113301)
Supplement: 18_2012_1179_MOESM2_ESM.pdf [file 18_2012_1179_MOESM2_ESM.pdf]

## Online resource 2

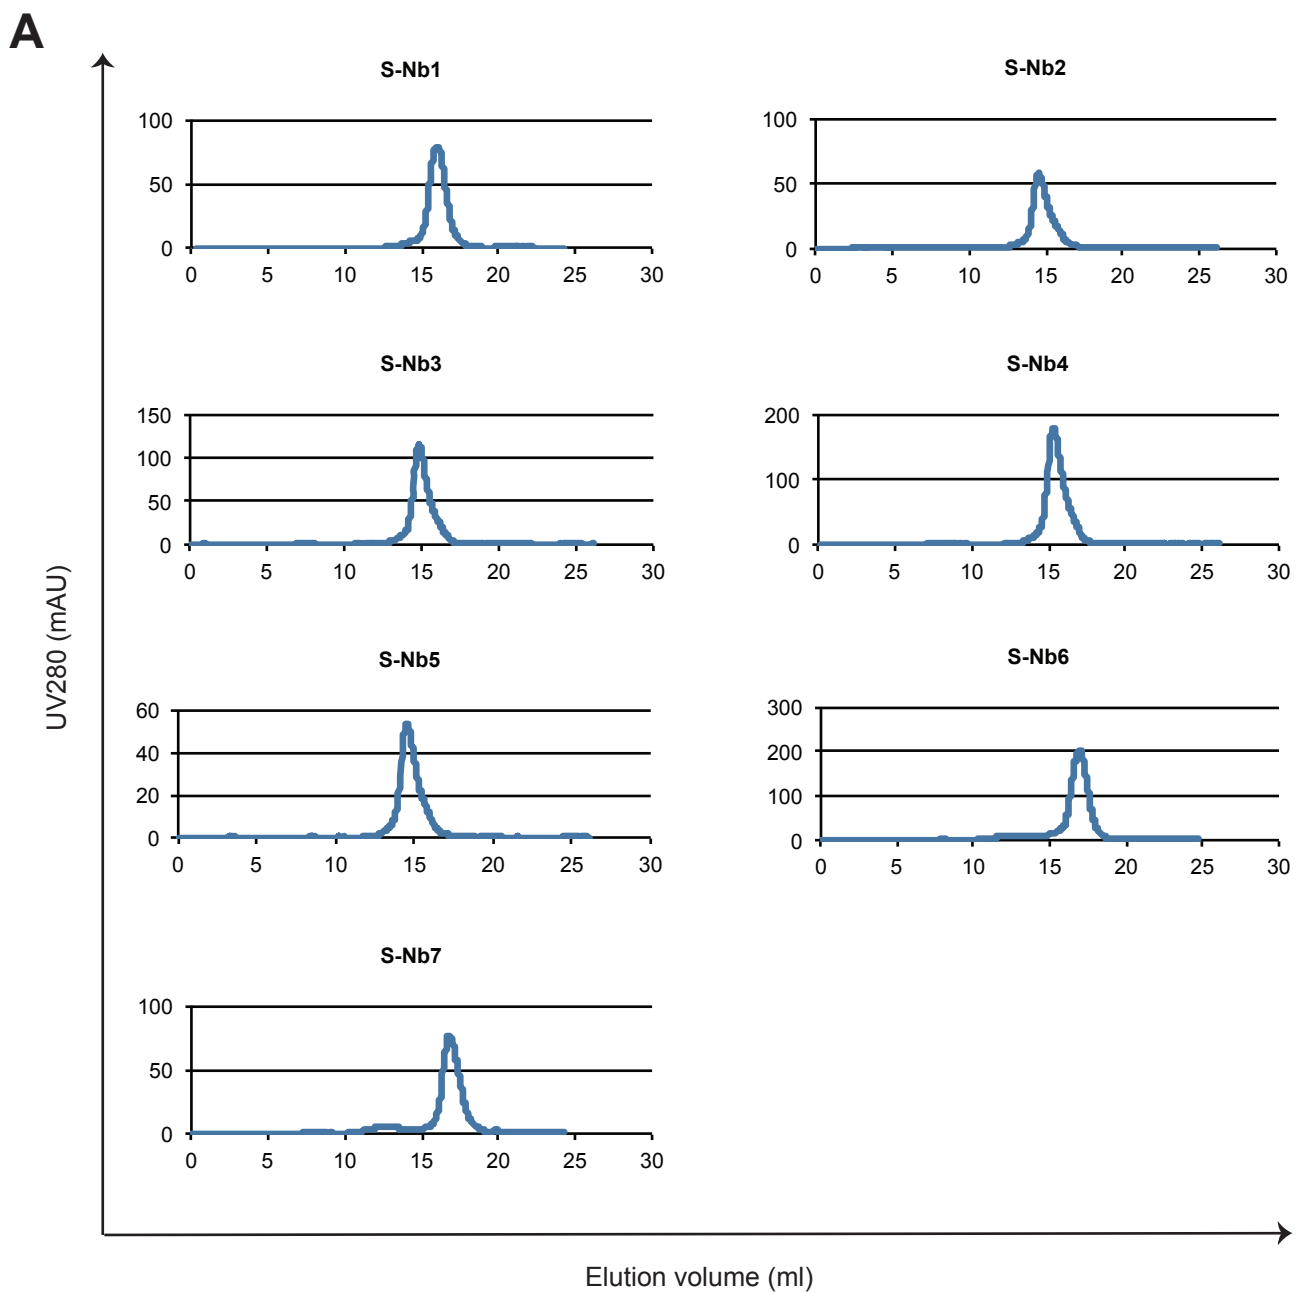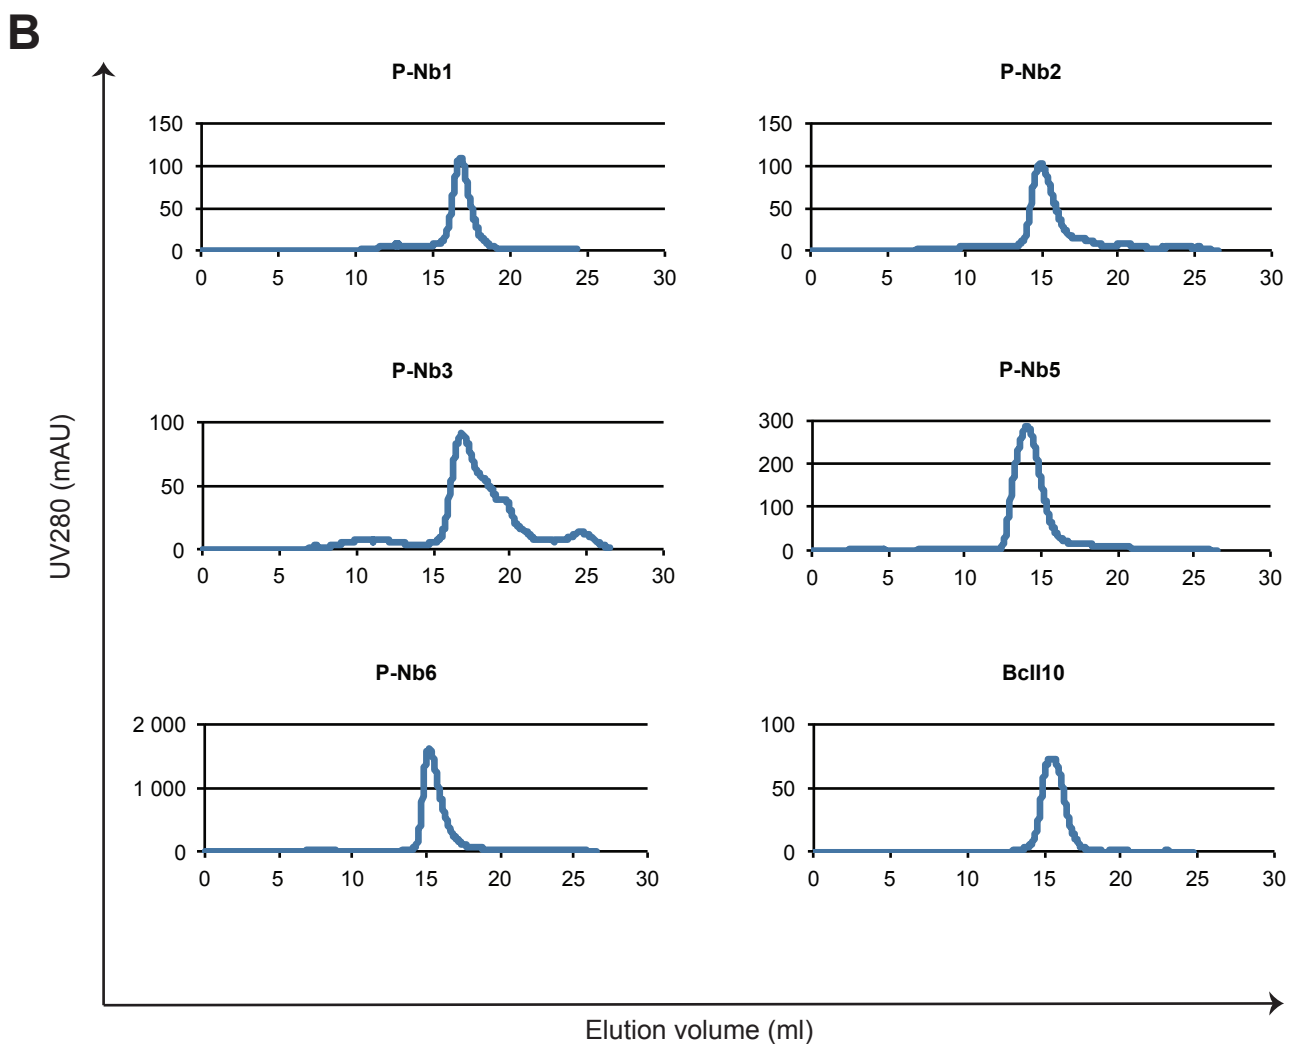

**Size exclusion chromatograms for Nanobodies from A) the staphylococcal selection and B) the phage display selection.** The samples were eluted in 200  $\mu$ l fractions, and only the fractions in the middle of the peak corresponding to monomeric protein were collected. Nanobodies from the staphylococcal selection are denoted S-NbX and Nanobodies from the phage selection are denoted P-NbX. Bcl10 is the negative control Nanobody.
