# Supplementary material
Source: PubMed Central journal article supplement (PMC11113301)
Supplement: 18_2012_1179_MOESM4_ESM.pdf [file 18_2012_1179_MOESM4_ESM.pdf]

## Online resource 4

**A**

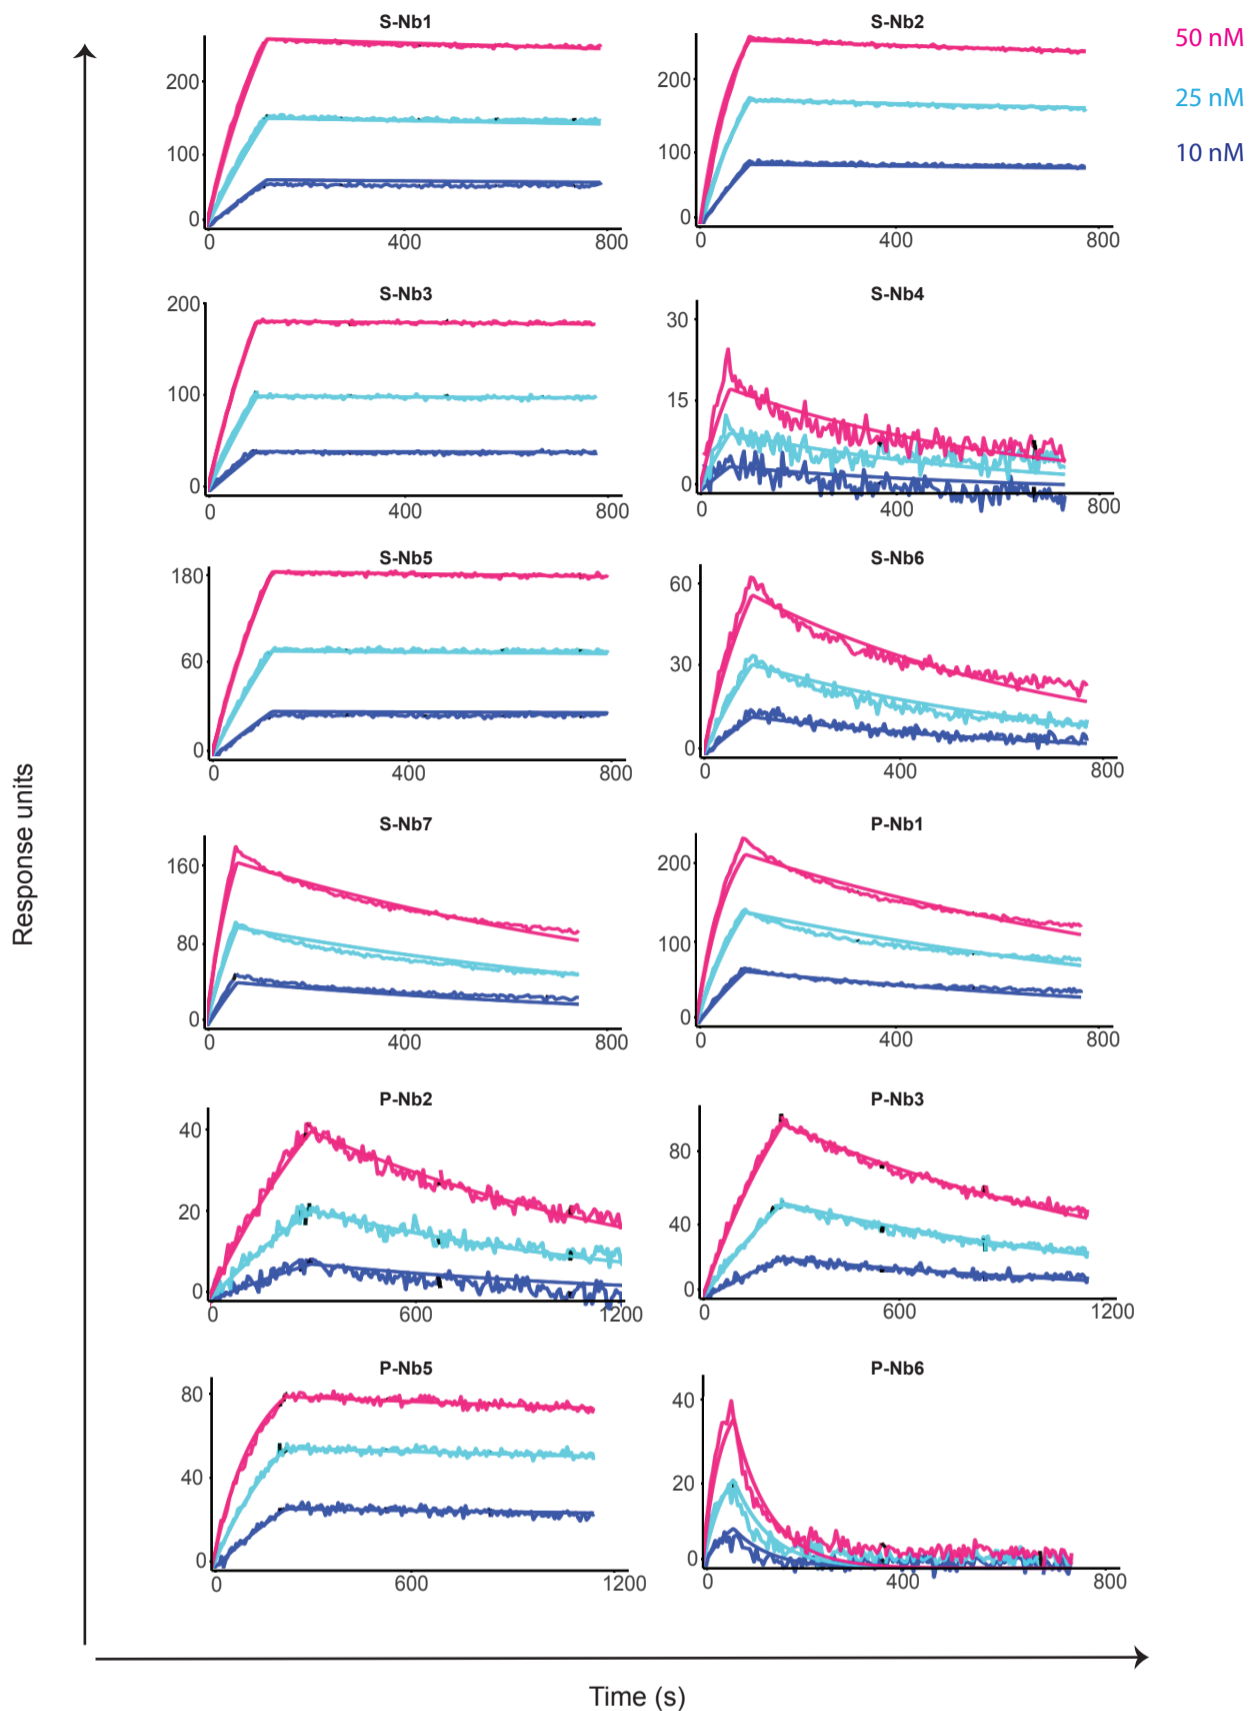

**B**

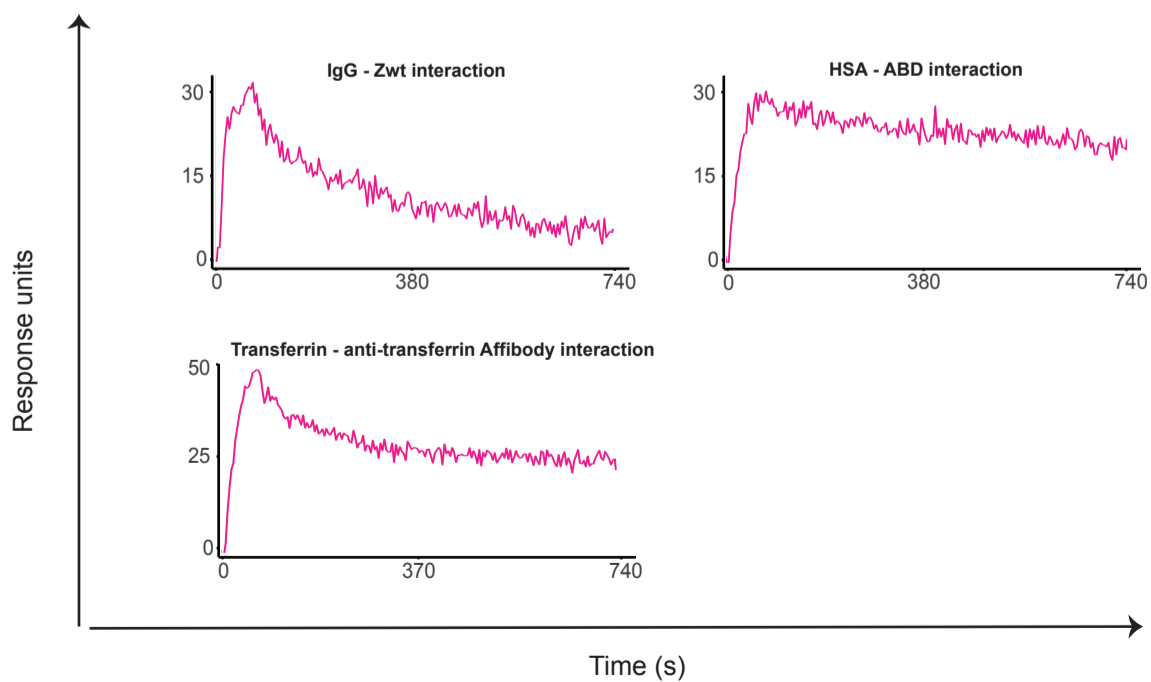

**SPR data for Nanobodies from the staphylococcal display and the phage display selection. a** Nanobodies were immobilized on respective chip surfaces and GFP was injected at three concentrations. Nanobodies from the staphylococcal selection are denoted S-NbX and Nanobodies from the phage selection are denoted P-NbX. **b Specificity experiment.** Nanobodies were injected over immobilized human IgG, HSA and transferrin (data not shown). To verify that the immobilized proteins were functional, Zwt, ABD and an anti-transferrin Affibody were injected over respective surface.
